# Supplementary material for: MicroRNA-608 Promotes Apoptosis in Non-Small Cell Lung Cancer Cells Treated With Doxorubicin Through the Inhibition of TFAP4
Source: PubMed Central journal article supplement (PMC6746977; doi:10.3389/fgene.2019.00809), 2019-09-10
Supplement: Table_2.pdf [file Table_2.pdf]

**Supplementary Table 2. Sequences of primers used in this experiment**

| <b>Primers for qPCR</b>                 | <b>sequence(5'---3')</b>                |
|-----------------------------------------|-----------------------------------------|
| miR-608-F                               | GGTGTGGGACAGCTCCGTA                     |
| miR-608-R                               | GTATCAACGCAGAGTACTTT                    |
| Pre miR-608-F                           | CCAGGGGTGGTGTGGGA                       |
| Pre miR-608-R                           | AAGAGGCAGCCTTTGATGGA                    |
| TFAP4-F                                 | GTGCCCACTCAGAAGGTGC                     |
| TFAP4-R                                 | GGCTACAGAGCCCTCCTATCA                   |
| TAp63-F                                 | ATGTCCCAGAGCACACAG                      |
| TAp63-R                                 | AGCTCATGGTTGGGGCAC                      |
| △Np63-F                                 | CAGACTCAATTTAGTGAG                      |
| △Np63-R                                 | AGCTCATGGTTGGGGCAC                      |
| TFE3-F                                  | CCCCTGCCATGTCGTCATC                     |
| TFE3-R                                  | GTGGACGGCTCAATGTGTG                     |
| TGFβ1-F                                 | GGCCAGATCCTGTCCAAGC                     |
| TGFβ1-R                                 | GTGGGTTTCCACCATTAGCAC                   |
| MAPK13-F                                | GAGAAGGTGGCCATCAAGAA                    |
| MAPK13-R                                | GTCCCTCATTACAGCCAGGT                    |
| PIK3CA-F                                | TGCTAAAGAGGAACACTGTCCA                  |
| PIK3CA-R                                | GGTACTGGCCAA AGATTCAAAG                 |
| human U6-F                              | CTCGTTCGGCAGCACA                        |
| human U6-R                              | AACGCTTCACGAATTTGCGT                    |
| human GAPDH-F                           | GGACTCATGACCACAGTCCATGCC                |
| human GAPDH-R                           | TCAGGGATGACCTTGCCACAG                   |
| <b>Primers for genotyping</b>           | <b>sequence(5'---3')</b>                |
| miR-608-F                               | TCTGGCTAGGTAATGGCTCC                    |
| miR-608-R                               | GCATCTGTGGCCTTCCATGA                    |
| <b>Primers for plasmid construction</b> | <b>sequence(5'---3')</b>                |
| MiR-608-F                               | TCTGGCTAGGTAATGGCTCC                    |
| MiR-608-R                               | CCCAGACCTACTAAGTTTAGCATCT               |
| TFAP4-WT-F                              | CTGTAAATCGACCTTTGAACGAAG                |
| TFAP4-WT-R                              | GAGAGAGACAGACATTTTTGGGG                 |
| TFAP4-Mut1-F                            | ATTTCGCCACTCTCAACACCCCCAGCCCCACCTCT     |
| TFAP4-Mut1-R                            | GTGTTGAGAGTGGCGAATTCTAGTGCCGAGATG       |
| TFAP4-Mut2-F                            | CTTAACACCCAAAAATGTCTGTCTCTCTCCCATG      |
| TFAP4-Mut2-R                            | GACATTTTTGGGTGTTAAGATGAGACCTGGAGGCAGAGG |
